# Supplementary material
Source: MDPI journal article supplement (https://www.mdpi.com/2073-4433/15/5/601)

*Electronic supplement of the paper:*

# **Future projections of precipitation extremes for Greece based on an ensemble of high-resolution Regional Climate Model simulations**

**Prodromos Zanis<sup>1,\*</sup>, Aristeidis K. Georgoulas<sup>1</sup>, Kondylia Velikou<sup>1</sup>, Dimitris Akritidis<sup>1</sup>, Alkiviadis Kalisoras<sup>1</sup>, Dimitris Melas<sup>2</sup>**

<sup>1</sup> Department of Meteorology and Climatology, School of Geology, Aristotle University of Thessaloniki, 54124 Thessaloniki, Greece; zanis@geo.auth.gr (P.Z.); ageor@auth.gr (A.K.G.); kvelikou@geo.auth.gr (K.V.); dakritid@geo.auth.gr (D.A.); kalisort@geo.auth.gr (A.K.)

<sup>2</sup> Laboratory of Atmospheric Physics, School of Physics, Aristotle University of Thessaloniki, 54124 Thessaloniki, Greece; melas@auth.gr (D.M.)

\* Correspondence: zanis@geo.auth.gr; Tel.: +302310998240

Supplementary Tables: S1–S5, Figures S1–S2

**Table S1 - PRTOT (pages 3-5):** Mean value and standard deviation of the annual total precipitation PRTOT (mm) for the reference period 1971-2000 and for two future periods (2021-2050 and 2071-2100) under different RCPs in 13 subregions of Greece. The percentage (%) mean difference ( $\pm\sigma$ ) of the two future periods with the reference period is also given for each RCP. The statistically significant percentage mean difference ( $\pm\sigma$ ) is in bold.

**Table S2 - R20 (pages 6-8):** Mean value and standard deviation of the very heavy precipitation days R20 (days) for the reference period 1971-2000 and for two future periods (2021-2050 and 2071-2100) under different RCPs in 13 subregions of Greece. The mean difference ( $\pm\sigma$ ) of the two future periods with the reference period is also given for each RCP. The statistically significant mean difference ( $\pm\sigma$ ) is in bold.

**Table S3 - Rx1day (pages 9-11):** Mean value and standard deviation of the highest 1-day precipitation amount Rx1day (mm) for the reference period 1971-2000 and for two future periods (2021-2050 and 2071-2100) under different RCPs in 13 subregions of Greece. The percentage (%) mean difference ( $\pm\sigma$ ) of the two future periods with the reference period is also given for each RCP. The statistically significant percentage mean difference ( $\pm\sigma$ ) is in bold.

**Table S4 - Rx5day (pages 12-14):** Mean value and standard deviation of the highest 5-day precipitation amount Rx5day (mm) for the reference period 1971-2000 and for two future periods (2021-2050 and 2071-2100) under different RCPs in 13 subregions of Greece. The percentage (%) mean difference ( $\pm\sigma$ ) of the two future periods with the reference period is also given for each RCP. The statistically significant percentage mean difference ( $\pm\sigma$ ) is in bold.

**Table S5 - RxTratio (pages 15-17):** Mean value and standard deviation of the ratio of highest 1-day precipitation amount and the annual total precipitation RxTRatio for the reference period 1971-2000 and for two future periods (2021-2050 and 2071-2100) under different RCPs in 13 subregions of Greece. The mean difference ( $\pm\sigma$ ) of the two future periods with the reference period is also given for each RCP. The statistically significant mean difference ( $\pm\sigma$ ) is in bold.

**Figure S1 - MB (page 18):** Mean bias (MB) of the EURO-CORDEX ensemble PRTOT fields for southeastern Europe relative to E-OBS v23.1e. Hatching indicates areas where the differences are not statistically significant at the 95% confidence level according to the independent-samples t-test. The MB, the normalized mean bias (NMB) and the spatial Pearson's correlation coefficient (Rspatial) values for the whole area are also illustrated.

**Figure S2 - Rx1day (pages 19-23):** Timeseries (1950-2100) with the percentage difference between the annual Rx1day and the mean Rx1day for the reference period (1971-2000) for the 13 subregions of Greece. Error bars denote the  $\pm 1\sigma$  from the 11 EURO-CORDEX simulations annual values and are plotted every 5 years. The boxplot on the right shows the mean difference (dot) between of the periods 1971-2000, 2021-2050 and 2071-2100 with the reference period. The middle lines in each box represent the corresponding median difference, the boxes indicate the range between the 25th and 75th percentiles and the whiskers the maximum and minimum difference values from the 11 EURO-CORDEX simulations (inter-model variability).

Table S1 - PRTOT (pages 3-5)

| Subreg.                       | Mode   | Period    | Mean<br>(mm) | StDev<br>(mm) | Mean diff. $\pm 1\sigma$<br>(%) |
|-------------------------------|--------|-----------|--------------|---------------|---------------------------------|
| EASTERN MACEDONIA &<br>THRACE | Hist   | 1971-2000 | 833.772      | 132.065       | 0.000 $\pm$ 22.400              |
|                               | RCP2.6 | 2021-2050 | 810.698      | 129.222       | -2.767 $\pm$ 22.161             |
|                               | RCP2.6 | 2071-2100 | 837.084      | 131.238       | 0.397 $\pm$ 22.330              |
|                               | RCP4.5 | 2021-2050 | 836.801      | 138.163       | 0.363 $\pm$ 22.923              |
|                               | RCP4.5 | 2071-2100 | 801.901      | 144.552       | -3.822 $\pm$ 23.483             |
|                               | RCP8.5 | 2021-2050 | 825.899      | 138.464       | -0.944 $\pm$ 22.949             |
|                               | RCP8.5 | 2071-2100 | 723.960      | 145.027       | -13.170 $\pm$ 23.525            |
| CENTRAL MACEDONIA &<br>ATHOS  | Hist   | 1971-2000 | 702.075      | 114.491       | 0.000 $\pm$ 23.062              |
|                               | RCP2.6 | 2021-2050 | 691.014      | 132.004       | -1.575 $\pm$ 24.889             |
|                               | RCP2.6 | 2071-2100 | 713.221      | 126.933       | 1.588 $\pm$ 24.348              |
|                               | RCP4.5 | 2021-2050 | 688.244      | 127.051       | -1.970 $\pm$ 24.360             |
|                               | RCP4.5 | 2071-2100 | 677.785      | 141.771       | -3.460 $\pm$ 25.956             |
|                               | RCP8.5 | 2021-2050 | 691.728      | 124.795       | -1.474 $\pm$ 24.123             |
|                               | RCP8.5 | 2071-2100 | 626.352      | 149.512       | -10.786 $\pm$ 26.823            |
| WESTERN MACEDONIA             | Hist   | 1971-2000 | 730.406      | 180.959       | 0.000 $\pm$ 35.037              |
|                               | RCP2.6 | 2021-2050 | 710.753      | 189.049       | -2.691 $\pm$ 35.829             |
|                               | RCP2.6 | 2071-2100 | 740.326      | 180.970       | 1.358 $\pm$ 35.038              |
|                               | RCP4.5 | 2021-2050 | 707.385      | 188.755       | -3.152 $\pm$ 35.800             |
|                               | RCP4.5 | 2071-2100 | 708.035      | 195.689       | -3.063 $\pm$ 36.491             |
|                               | RCP8.5 | 2021-2050 | 717.030      | 178.519       | -1.831 $\pm$ 34.802             |
|                               | RCP8.5 | 2071-2100 | 652.586      | 194.809       | -10.654 $\pm$ 36.403            |
| EPIRUS                        | Hist   | 1971-2000 | 1479.835     | 260.443       | 0.000 $\pm$ 24.889              |
|                               | RCP2.6 | 2021-2050 | 1449.281     | 266.038       | -2.065 $\pm$ 25.158             |
|                               | RCP2.6 | 2071-2100 | 1486.832     | 252.338       | 0.473 $\pm$ 24.505              |
|                               | RCP4.5 | 2021-2050 | 1446.917     | 253.797       | -2.224 $\pm$ 24.574             |
|                               | RCP4.5 | 2071-2100 | 1403.877     | 272.855       | -5.133 $\pm$ 25.489             |
|                               | RCP8.5 | 2021-2050 | 1457.594     | 258.420       | -1.503 $\pm$ 24.793             |
|                               | RCP8.5 | 2071-2100 | 1258.919     | 290.604       | -14.928 $\pm$ 26.370            |

|                |        |           |          |         |                         |
|----------------|--------|-----------|----------|---------|-------------------------|
| THESSALY       | Hist   | 1971-2000 | 818.101  | 196.929 | 0.000 ± 34.042          |
|                | RCP2.6 | 2021-2050 | 799.028  | 221.552 | -2.331 ± 36.233         |
|                | RCP2.6 | 2071-2100 | 842.583  | 214.625 | 2.992 ± 35.605          |
|                | RCP4.5 | 2021-2050 | 781.739  | 208.707 | -4.445 ± 35.075         |
|                | RCP4.5 | 2071-2100 | 784.444  | 225.262 | -4.114 ± 36.573         |
|                | RCP8.5 | 2021-2050 | 791.481  | 202.299 | -3.254 ± 34.509         |
|                | RCP8.5 | 2071-2100 | 722.756  | 229.089 | -11.654 ± 36.927        |
| IONIAN ISLANDS | Hist   | 1971-2000 | 1107.319 | 186.411 | 0.000 ± 23.807          |
|                | RCP2.6 | 2021-2050 | 1075.843 | 207.606 | -2.843 ± 25.197         |
|                | RCP2.6 | 2071-2100 | 1130.421 | 195.315 | 2.086 ± 24.383          |
|                | RCP4.5 | 2021-2050 | 1089.020 | 212.633 | -1.653 ± 25.537         |
|                | RCP4.5 | 2071-2100 | 1040.754 | 201.729 | -6.011 ± 24.805         |
|                | RCP8.5 | 2021-2050 | 1085.957 | 225.540 | -1.929 ± 26.425         |
|                | RCP8.5 | 2071-2100 | 937.735  | 212.248 | -15.315 ± 25.511        |
| WESTERN GREECE | Hist   | 1971-2000 | 1194.044 | 203.210 | 0.000 ± 24.068          |
|                | RCP2.6 | 2021-2050 | 1154.115 | 207.407 | -3.344 ± 24.318         |
|                | RCP2.6 | 2071-2100 | 1186.976 | 185.387 | -0.592 ± 23.037         |
|                | RCP4.5 | 2021-2050 | 1170.184 | 196.667 | -1.998 ± 23.684         |
|                | RCP4.5 | 2071-2100 | 1117.984 | 206.243 | -6.370 ± 24.248         |
|                | RCP8.5 | 2021-2050 | 1165.703 | 201.296 | -2.373 ± 23.955         |
|                | RCP8.5 | 2071-2100 | 983.878  | 221.693 | <b>-17.601 ± 25.186</b> |
| CENTRAL GREECE | Hist   | 1971-2000 | 830.571  | 207.583 | 0.000 ± 35.345          |
|                | RCP2.6 | 2021-2050 | 815.479  | 227.858 | -1.817 ± 37.111         |
|                | RCP2.6 | 2071-2100 | 837.994  | 221.353 | 0.894 ± 36.536          |
|                | RCP4.5 | 2021-2050 | 798.580  | 213.008 | -3.852 ± 35.810         |
|                | RCP4.5 | 2071-2100 | 787.424  | 237.640 | -5.195 ± 37.990         |
|                | RCP8.5 | 2021-2050 | 802.243  | 212.731 | -3.411 ± 35.786         |
|                | RCP8.5 | 2071-2100 | 717.526  | 230.996 | -13.611 ± 37.392        |
| ATTICA         | Hist   | 1971-2000 | 513.082  | 97.152  | 0.000 ± 26.778          |
|                | RCP2.6 | 2021-2050 | 497.270  | 109.344 | -3.082 ± 28.508         |
|                | RCP2.6 | 2071-2100 | 508.137  | 104.980 | -0.964 ± 27.878         |
|                | RCP4.5 | 2021-2050 | 489.731  | 105.072 | -4.551 ± 27.891         |
|                | RCP4.5 | 2071-2100 | 476.464  | 114.413 | -7.137 ± 29.254         |

|              |        |           |         |         |                         |
|--------------|--------|-----------|---------|---------|-------------------------|
|              | RCP8.5 | 2021-2050 | 493.877 | 107.019 | -3.743 ± 28.171         |
|              | RCP8.5 | 2071-2100 | 422.198 | 105.831 | <b>-17.713 ± 28.000</b> |
| PELOPONNESE  | Hist   | 1971-2000 | 830.149 | 209.757 | 0.000 ± 35.733          |
|              | RCP2.6 | 2021-2050 | 789.965 | 219.295 | -4.841 ± 36.555         |
|              | RCP2.6 | 2071-2100 | 816.083 | 205.233 | -1.694 ± 35.350         |
|              | RCP4.5 | 2021-2050 | 790.396 | 212.460 | -4.789 ± 35.964         |
|              | RCP4.5 | 2071-2100 | 748.379 | 213.865 | -9.850 ± 36.085         |
|              | RCP8.5 | 2021-2050 | 790.023 | 210.493 | -4.834 ± 35.796         |
|              | RCP8.5 | 2071-2100 | 657.337 | 214.566 | -20.817 ± 36.145        |
| NORTH AEGEAN | Hist   | 1971-2000 | 694.150 | 145.521 | 0.000 ± 29.648          |
|              | RCP2.6 | 2021-2050 | 681.395 | 147.940 | -1.837 ± 29.895         |
|              | RCP2.6 | 2071-2100 | 716.674 | 150.707 | 3.245 ± 30.180          |
|              | RCP4.5 | 2021-2050 | 700.678 | 147.918 | 0.941 ± 29.893          |
|              | RCP4.5 | 2071-2100 | 668.483 | 144.660 | -3.698 ± 29.560         |
|              | RCP8.5 | 2021-2050 | 697.848 | 155.425 | 0.533 ± 30.673          |
|              | RCP8.5 | 2071-2100 | 591.545 | 137.709 | -14.781 ± 28.863        |
| SOUTH AEGEAN | Hist   | 1971-2000 | 553.536 | 72.131  | 0.000 ± 18.428          |
|              | RCP2.6 | 2021-2050 | 535.432 | 85.745  | -3.270 ± 20.243         |
|              | RCP2.6 | 2071-2100 | 560.178 | 81.628  | 1.200 ± 19.679          |
|              | RCP4.5 | 2021-2050 | 532.774 | 73.514  | -3.751 ± 18.606         |
|              | RCP4.5 | 2071-2100 | 512.473 | 77.964  | -7.418 ± 19.188         |
|              | RCP8.5 | 2021-2050 | 537.780 | 84.014  | -2.846 ± 20.004         |
|              | RCP8.5 | 2071-2100 | 438.096 | 80.840  | <b>-20.855 ± 19.573</b> |
| CRETE        | Hist   | 1971-2000 | 843.481 | 214.869 | 0.000 ± 36.026          |
|              | RCP2.6 | 2021-2050 | 793.535 | 202.965 | -5.921 ± 35.042         |
|              | RCP2.6 | 2071-2100 | 807.965 | 209.650 | -4.211 ± 35.591         |
|              | RCP4.5 | 2021-2050 | 776.726 | 205.767 | -7.914 ± 35.271         |
|              | RCP4.5 | 2071-2100 | 745.199 | 194.475 | -11.652 ± 34.359        |
|              | RCP8.5 | 2021-2050 | 777.618 | 195.868 | -7.808 ± 34.470         |
|              | RCP8.5 | 2071-2100 | 619.772 | 187.133 | <b>-26.522 ± 33.781</b> |

Table S2 - R20 (pages 6-8)

| Subreg.                       | Mode   | Period    | Mean<br>(days) | StDev<br>(days) | Mean diff. $\pm 1\sigma$<br>(days) |
|-------------------------------|--------|-----------|----------------|-----------------|------------------------------------|
| EASTERN MACEDONIA &<br>THRACE | Hist   | 1971-2000 | 9.946          | 2.382           | 0.000 $\pm$ 3.369                  |
|                               | RCP2.6 | 2021-2050 | 9.737          | 2.173           | -0.208 $\pm$ 3.224                 |
|                               | RCP2.6 | 2071-2100 | 10.038         | 2.276           | 0.092 $\pm$ 3.294                  |
|                               | RCP4.5 | 2021-2050 | 10.309         | 2.503           | 0.363 $\pm$ 3.455                  |
|                               | RCP4.5 | 2071-2100 | 9.889          | 2.486           | -0.056 $\pm$ 3.443                 |
|                               | RCP8.5 | 2021-2050 | 10.019         | 2.560           | 0.073 $\pm$ 3.497                  |
|                               | RCP8.5 | 2071-2100 | 9.089          | 2.216           | -0.857 $\pm$ 3.253                 |
| CENTRAL MACEDONIA &<br>ATHOS  | Hist   | 1971-2000 | 7.495          | 1.821           | 0.000 $\pm$ 2.575                  |
|                               | RCP2.6 | 2021-2050 | 7.446          | 2.118           | -0.049 $\pm$ 2.793                 |
|                               | RCP2.6 | 2071-2100 | 7.765          | 2.079           | 0.270 $\pm$ 2.763                  |
|                               | RCP4.5 | 2021-2050 | 7.528          | 2.090           | 0.033 $\pm$ 2.772                  |
|                               | RCP4.5 | 2071-2100 | 7.593          | 2.196           | 0.098 $\pm$ 2.852                  |
|                               | RCP8.5 | 2021-2050 | 7.552          | 2.025           | 0.057 $\pm$ 2.723                  |
|                               | RCP8.5 | 2071-2100 | 7.141          | 2.183           | -0.354 $\pm$ 2.842                 |
| WESTERN MACEDONIA             | Hist   | 1971-2000 | 6.449          | 3.198           | 0.000 $\pm$ 4.523                  |
|                               | RCP2.6 | 2021-2050 | 6.468          | 3.349           | 0.019 $\pm$ 4.631                  |
|                               | RCP2.6 | 2071-2100 | 6.814          | 3.342           | 0.365 $\pm$ 4.626                  |
|                               | RCP4.5 | 2021-2050 | 6.416          | 3.460           | -0.033 $\pm$ 4.711                 |
|                               | RCP4.5 | 2071-2100 | 6.967          | 3.560           | 0.518 $\pm$ 4.786                  |
|                               | RCP8.5 | 2021-2050 | 6.723          | 3.214           | 0.274 $\pm$ 4.534                  |
|                               | RCP8.5 | 2071-2100 | 6.741          | 3.361           | 0.292 $\pm$ 4.640                  |
| EPIRUS                        | Hist   | 1971-2000 | 21.964         | 5.911           | 0.000 $\pm$ 8.359                  |
|                               | RCP2.6 | 2021-2050 | 21.606         | 5.741           | -0.358 $\pm$ 8.240                 |
|                               | RCP2.6 | 2071-2100 | 22.022         | 5.504           | 0.058 $\pm$ 8.077                  |
|                               | RCP4.5 | 2021-2050 | 21.671         | 5.593           | -0.293 $\pm$ 8.137                 |
|                               | RCP4.5 | 2071-2100 | 20.965         | 5.746           | -0.999 $\pm$ 8.244                 |
|                               | RCP8.5 | 2021-2050 | 21.638         | 5.585           | -0.326 $\pm$ 8.132                 |
|                               | RCP8.5 | 2071-2100 | 18.964         | 5.890           | -3.000 $\pm$ 8.344                 |

|                |        |           |        |       |                |
|----------------|--------|-----------|--------|-------|----------------|
| THESSALY       | Hist   | 1971-2000 | 9.405  | 3.602 | 0.000 ± 5.094  |
|                | RCP2.6 | 2021-2050 | 9.252  | 3.896 | -0.153 ± 5.306 |
|                | RCP2.6 | 2071-2100 | 10.043 | 3.908 | 0.637 ± 5.315  |
|                | RCP4.5 | 2021-2050 | 9.044  | 3.799 | -0.362 ± 5.235 |
|                | RCP4.5 | 2071-2100 | 9.300  | 3.919 | -0.105 ± 5.323 |
|                | RCP8.5 | 2021-2050 | 9.323  | 3.587 | -0.082 ± 5.083 |
|                | RCP8.5 | 2071-2100 | 8.718  | 3.841 | -0.687 ± 5.265 |
| IONIAN ISLANDS | Hist   | 1971-2000 | 15.035 | 3.632 | 0.000 ± 5.136  |
|                | RCP2.6 | 2021-2050 | 14.657 | 3.638 | -0.378 ± 5.140 |
|                | RCP2.6 | 2071-2100 | 15.561 | 3.480 | 0.526 ± 5.030  |
|                | RCP4.5 | 2021-2050 | 15.113 | 3.926 | 0.078 ± 5.349  |
|                | RCP4.5 | 2071-2100 | 14.391 | 3.394 | -0.644 ± 4.971 |
|                | RCP8.5 | 2021-2050 | 14.870 | 4.114 | -0.165 ± 5.488 |
|                | RCP8.5 | 2071-2100 | 12.884 | 3.415 | -2.151 ± 4.985 |
| WESTERN GREECE | Hist   | 1971-2000 | 16.720 | 4.102 | 0.000 ± 5.802  |
|                | RCP2.6 | 2021-2050 | 16.288 | 3.983 | -0.431 ± 5.718 |
|                | RCP2.6 | 2071-2100 | 16.666 | 3.561 | -0.054 ± 5.432 |
|                | RCP4.5 | 2021-2050 | 16.695 | 3.909 | -0.025 ± 5.667 |
|                | RCP4.5 | 2071-2100 | 15.949 | 3.926 | -0.770 ± 5.678 |
|                | RCP8.5 | 2021-2050 | 16.536 | 3.965 | -0.184 ± 5.706 |
|                | RCP8.5 | 2071-2100 | 13.893 | 3.911 | -2.827 ± 5.668 |
| CENTRAL GREECE | Hist   | 1971-2000 | 9.788  | 3.694 | 0.000 ± 5.224  |
|                | RCP2.6 | 2021-2050 | 9.768  | 3.984 | -0.019 ± 5.433 |
|                | RCP2.6 | 2071-2100 | 10.176 | 3.985 | 0.389 ± 5.434  |
|                | RCP4.5 | 2021-2050 | 9.569  | 3.843 | -0.219 ± 5.330 |
|                | RCP4.5 | 2071-2100 | 9.523  | 4.186 | -0.264 ± 5.582 |
|                | RCP8.5 | 2021-2050 | 9.710  | 3.726 | -0.078 ± 5.246 |
|                | RCP8.5 | 2071-2100 | 8.739  | 3.853 | -1.049 ± 5.337 |
| ATTICA         | Hist   | 1971-2000 | 5.017  | 1.471 | 0.000 ± 2.080  |
|                | RCP2.6 | 2021-2050 | 4.934  | 1.566 | -0.083 ± 2.148 |
|                | RCP2.6 | 2071-2100 | 5.165  | 1.629 | 0.148 ± 2.195  |
|                | RCP4.5 | 2021-2050 | 4.871  | 1.605 | -0.146 ± 2.177 |
|                | RCP4.5 | 2071-2100 | 4.853  | 1.701 | -0.164 ± 2.249 |

|             |        |           |        |       |                |
|-------------|--------|-----------|--------|-------|----------------|
| PELOPONNESE | RCP8.5 | 2021-2050 | 5.057  | 1.501 | 0.040 ± 2.102  |
|             | RCP8.5 | 2071-2100 | 4.403  | 1.353 | -0.614 ± 1.999 |
|             | Hist   | 1971-2000 | 9.905  | 3.814 | 0.000 ± 5.393  |
|             | RCP2.6 | 2021-2050 | 9.453  | 3.916 | -0.452 ± 5.466 |
|             | RCP2.6 | 2071-2100 | 9.795  | 3.726 | -0.110 ± 5.332 |
|             | RCP4.5 | 2021-2050 | 9.610  | 3.886 | -0.295 ± 5.445 |
|             | RCP4.5 | 2071-2100 | 9.021  | 3.672 | -0.884 ± 5.294 |
|             | RCP8.5 | 2021-2050 | 9.577  | 3.790 | -0.328 ± 5.377 |
|             | RCP8.5 | 2071-2100 | 7.959  | 3.472 | -1.946 ± 5.157 |
|             | Hist   | 1971-2000 | 8.357  | 2.549 | 0.000 ± 3.605  |
|             | RCP2.6 | 2021-2050 | 8.399  | 2.554 | 0.043 ± 3.608  |
|             | RCP2.6 | 2071-2100 | 9.059  | 2.692 | 0.702 ± 3.707  |
|             | RCP4.5 | 2021-2050 | 8.810  | 2.638 | 0.454 ± 3.668  |
|             | RCP4.5 | 2071-2100 | 8.476  | 2.381 | 0.120 ± 3.488  |
|             | RCP8.5 | 2021-2050 | 8.791  | 2.751 | 0.435 ± 3.751  |
|             | RCP8.5 | 2071-2100 | 7.572  | 2.187 | -0.785 ± 3.359 |
|             | Hist   | 1971-2000 | 5.108  | 1.076 | 0.000 ± 1.521  |
|             | RCP2.6 | 2021-2050 | 5.076  | 1.047 | -0.032 ± 1.501 |
|             | RCP2.6 | 2071-2100 | 5.500  | 1.218 | 0.392 ± 1.625  |
|             | RCP4.5 | 2021-2050 | 5.029  | 1.013 | -0.079 ± 1.478 |
|             | RCP4.5 | 2071-2100 | 4.936  | 0.869 | -0.172 ± 1.383 |
|             | RCP8.5 | 2021-2050 | 5.200  | 1.144 | 0.092 ± 1.570  |
|             | RCP8.5 | 2071-2100 | 4.354  | 0.914 | -0.753 ± 1.412 |
|             | Hist   | 1971-2000 | 10.189 | 3.778 | 0.000 ± 5.343  |
|             | RCP2.6 | 2021-2050 | 9.470  | 3.413 | -0.719 ± 5.091 |
|             | RCP2.6 | 2071-2100 | 9.804  | 3.663 | -0.385 ± 5.263 |
|             | RCP4.5 | 2021-2050 | 9.328  | 3.595 | -0.861 ± 5.215 |
|             | RCP4.5 | 2071-2100 | 8.890  | 3.286 | -1.299 ± 5.007 |
|             | RCP8.5 | 2021-2050 | 9.322  | 3.288 | -0.867 ± 5.008 |
|             | RCP8.5 | 2071-2100 | 7.241  | 2.942 | -2.948 ± 4.788 |



Table S3 - Rx1day (pages 9-11)

| Subreg.                       | Mode   | Period    | Mean<br>(mm) | StDev<br>(mm) | Mean diff. $\pm 1\sigma$<br>(%) |
|-------------------------------|--------|-----------|--------------|---------------|---------------------------------|
| EASTERN MACEDONIA &<br>THRACE | Hist   | 1971-2000 | 61.125       | 8.163         | 0.000 $\pm$ 18.887              |
|                               | RCP2.6 | 2021-2050 | 62.176       | 6.718         | 1.719 $\pm$ 17.296              |
|                               | RCP2.6 | 2071-2100 | 62.580       | 7.677         | 2.380 $\pm$ 18.333              |
|                               | RCP4.5 | 2021-2050 | 62.415       | 6.830         | 2.110 $\pm$ 17.413              |
|                               | RCP4.5 | 2071-2100 | 63.886       | 6.389         | 4.517 $\pm$ 16.959              |
|                               | RCP8.5 | 2021-2050 | 62.217       | 6.883         | 1.787 $\pm$ 17.469              |
|                               | RCP8.5 | 2071-2100 | 64.247       | 6.986         | 5.107 $\pm$ 17.578              |
| CENTRAL MACEDONIA &<br>ATHOS  | Hist   | 1971-2000 | 54.402       | 4.787         | 0.000 $\pm$ 12.443              |
|                               | RCP2.6 | 2021-2050 | 56.338       | 6.418         | 3.559 $\pm$ 14.717              |
|                               | RCP2.6 | 2071-2100 | 56.270       | 4.575         | 3.434 $\pm$ 12.171              |
|                               | RCP4.5 | 2021-2050 | 54.901       | 4.592         | 0.918 $\pm$ 12.193              |
|                               | RCP4.5 | 2071-2100 | 57.288       | 5.812         | 5.306 $\pm$ 13.841              |
|                               | RCP8.5 | 2021-2050 | 55.871       | 5.684         | 2.700 $\pm$ 13.660              |
|                               | RCP8.5 | 2071-2100 | 59.704       | 7.626         | 9.747 $\pm$ 16.550              |
| WESTERN MACEDONIA             | Hist   | 1971-2000 | 44.716       | 6.761         | 0.000 $\pm$ 21.383              |
|                               | RCP2.6 | 2021-2050 | 46.299       | 7.872         | 3.541 $\pm$ 23.207              |
|                               | RCP2.6 | 2071-2100 | 47.965       | 6.382         | 7.266 $\pm$ 20.793              |
|                               | RCP4.5 | 2021-2050 | 45.249       | 5.212         | 1.192 $\pm$ 19.092              |
|                               | RCP4.5 | 2071-2100 | 48.544       | 5.542         | 8.561 $\pm$ 19.550              |
|                               | RCP8.5 | 2021-2050 | 46.375       | 7.477         | 3.712 $\pm$ 22.544              |
|                               | RCP8.5 | 2071-2100 | 49.981       | 6.721         | 11.774 $\pm$ 21.319             |
| EPIRUS                        | Hist   | 1971-2000 | 76.750       | 12.383        | 0.000 $\pm$ 22.816              |
|                               | RCP2.6 | 2021-2050 | 80.699       | 12.132        | 5.146 $\pm$ 22.587              |
|                               | RCP2.6 | 2071-2100 | 80.886       | 14.098        | 5.389 $\pm$ 24.448              |
|                               | RCP4.5 | 2021-2050 | 78.135       | 10.971        | 1.805 $\pm$ 21.556              |
|                               | RCP4.5 | 2071-2100 | 79.644       | 10.557        | 3.771 $\pm$ 21.201              |
|                               | RCP8.5 | 2021-2050 | 80.519       | 12.255        | 4.911 $\pm$ 22.699              |
|                               | RCP8.5 | 2071-2100 | 80.654       | 12.855        | 5.087 $\pm$ 23.255              |

|                |        |           |        |        |                        |
|----------------|--------|-----------|--------|--------|------------------------|
| THESSALY       | Hist   | 1971-2000 | 60.571 | 5.659  | 0.000 ± 13.212         |
|                | RCP2.6 | 2021-2050 | 62.604 | 7.377  | 3.357 ± 15.349         |
|                | RCP2.6 | 2071-2100 | 65.064 | 7.524  | 7.418 ± 15.543         |
|                | RCP4.5 | 2021-2050 | 60.504 | 6.237  | -0.111 ± 13.904        |
|                | RCP4.5 | 2071-2100 | 65.192 | 7.972  | 7.629 ± 16.140         |
|                | RCP8.5 | 2021-2050 | 61.830 | 6.404  | 2.078 ± 14.108         |
|                | RCP8.5 | 2071-2100 | 68.158 | 8.732  | <b>12.526 ± 17.179</b> |
| IONIAN ISLANDS | Hist   | 1971-2000 | 63.009 | 5.992  | 0.000 ± 13.448         |
|                | RCP2.6 | 2021-2050 | 63.995 | 6.412  | 1.564 ± 13.928         |
|                | RCP2.6 | 2071-2100 | 66.041 | 6.391  | 4.811 ± 13.904         |
|                | RCP4.5 | 2021-2050 | 62.250 | 6.284  | -1.205 ± 13.780        |
|                | RCP4.5 | 2071-2100 | 65.576 | 6.128  | 4.073 ± 13.602         |
|                | RCP8.5 | 2021-2050 | 63.925 | 5.626  | 1.454 ± 13.044         |
|                | RCP8.5 | 2071-2100 | 69.374 | 7.243  | <b>10.101 ± 14.918</b> |
| WESTERN GREECE | Hist   | 1971-2000 | 65.580 | 10.397 | 0.000 ± 22.420         |
|                | RCP2.6 | 2021-2050 | 66.031 | 9.115  | 0.687 ± 21.083         |
|                | RCP2.6 | 2071-2100 | 67.162 | 11.179 | 2.412 ± 23.279         |
|                | RCP4.5 | 2021-2050 | 66.274 | 8.485  | 1.057 ± 20.463         |
|                | RCP4.5 | 2071-2100 | 66.824 | 8.968  | 1.897 ± 20.937         |
|                | RCP8.5 | 2021-2050 | 66.814 | 7.489  | 1.881 ± 19.538         |
|                | RCP8.5 | 2071-2100 | 69.491 | 8.403  | 5.962 ± 20.384         |
| CENTRAL GREECE | Hist   | 1971-2000 | 59.630 | 5.607  | 0.000 ± 13.298         |
|                | RCP2.6 | 2021-2050 | 60.445 | 6.003  | 1.367 ± 13.776         |
|                | RCP2.6 | 2071-2100 | 61.601 | 5.532  | 3.305 ± 13.209         |
|                | RCP4.5 | 2021-2050 | 59.752 | 4.508  | 0.205 ± 12.065         |
|                | RCP4.5 | 2071-2100 | 61.081 | 6.675  | 2.433 ± 14.619         |
|                | RCP8.5 | 2021-2050 | 61.078 | 4.829  | 2.428 ± 12.410         |
|                | RCP8.5 | 2071-2100 | 65.560 | 6.309  | <b>9.945 ± 14.155</b>  |
| ATTICA         | Hist   | 1971-2000 | 46.265 | 4.588  | 0.000 ± 14.024         |
|                | RCP2.6 | 2021-2050 | 46.873 | 3.627  | 1.315 ± 12.641         |
|                | RCP2.6 | 2071-2100 | 47.112 | 3.346  | 1.829 ± 12.274         |
|                | RCP4.5 | 2021-2050 | 46.424 | 4.366  | 0.344 ± 13.688         |
|                | RCP4.5 | 2071-2100 | 47.820 | 5.518  | 3.362 ± 15.511         |

|              |        |           |        |       |                       |
|--------------|--------|-----------|--------|-------|-----------------------|
|              | RCP8.5 | 2021-2050 | 47.947 | 3.666 | 3.636 ± 12.694        |
|              | RCP8.5 | 2071-2100 | 49.605 | 4.417 | 7.219 ± 13.765        |
| PELOPONNESE  | Hist   | 1971-2000 | 58.082 | 7.273 | 0.000 ± 17.708        |
|              | RCP2.6 | 2021-2050 | 57.066 | 5.405 | -1.749 ± 15.601       |
|              | RCP2.6 | 2071-2100 | 60.035 | 6.246 | 3.362 ± 16.506        |
|              | RCP4.5 | 2021-2050 | 56.335 | 5.455 | -3.009 ± 15.652       |
|              | RCP4.5 | 2071-2100 | 57.109 | 5.729 | -1.675 ± 15.939       |
|              | RCP8.5 | 2021-2050 | 59.628 | 4.345 | 2.661 ± 14.586        |
|              | RCP8.5 | 2071-2100 | 57.436 | 4.157 | -1.112 ± 14.423       |
| NORTH AEGEAN | Hist   | 1971-2000 | 50.963 | 4.567 | 0.000 ± 12.673        |
|              | RCP2.6 | 2021-2050 | 52.952 | 5.967 | 3.904 ± 14.744        |
|              | RCP2.6 | 2071-2100 | 54.202 | 6.288 | 6.357 ± 15.250        |
|              | RCP4.5 | 2021-2050 | 52.813 | 4.842 | 3.631 ± 13.061        |
|              | RCP4.5 | 2071-2100 | 54.584 | 5.440 | 7.107 ± 13.937        |
|              | RCP8.5 | 2021-2050 | 54.485 | 5.575 | 6.912 ± 14.141        |
|              | RCP8.5 | 2071-2100 | 56.047 | 5.858 | <b>9.976 ± 14.574</b> |
| SOUTH AEGEAN | Hist   | 1971-2000 | 42.561 | 3.079 | 0.000 ± 10.231        |
|              | RCP2.6 | 2021-2050 | 44.546 | 3.570 | 4.663 ± 11.078        |
|              | RCP2.6 | 2071-2100 | 45.005 | 3.611 | 5.741 ± 11.150        |
|              | RCP4.5 | 2021-2050 | 44.187 | 3.049 | 3.821 ± 10.181        |
|              | RCP4.5 | 2071-2100 | 45.652 | 3.687 | <b>7.261 ± 11.286</b> |
|              | RCP8.5 | 2021-2050 | 44.941 | 4.072 | 5.591 ± 11.994        |
|              | RCP8.5 | 2071-2100 | 44.943 | 3.014 | 5.595 ± 10.123        |
| CRETE        | Hist   | 1971-2000 | 58.185 | 9.635 | 0.000 ± 23.419        |
|              | RCP2.6 | 2021-2050 | 58.764 | 8.796 | 0.995 ± 22.422        |
|              | RCP2.6 | 2071-2100 | 59.551 | 9.323 | 2.348 ± 23.043        |
|              | RCP4.5 | 2021-2050 | 57.224 | 9.045 | -1.651 ± 22.713       |
|              | RCP4.5 | 2071-2100 | 59.260 | 9.638 | 1.847 ± 23.422        |
|              | RCP8.5 | 2021-2050 | 59.719 | 8.155 | 2.637 ± 21.695        |
|              | RCP8.5 | 2071-2100 | 55.038 | 7.516 | -5.408 ± 21.002       |

Table S4 - Rx5day (pages 12-14)

| Subreg.                       | Mode   | Period    | Mean<br>(mm) | StDev<br>(mm) | Mean diff. $\pm 1\sigma$<br>(%) |
|-------------------------------|--------|-----------|--------------|---------------|---------------------------------|
| EASTERN MACEDONIA &<br>THRACE | Hist   | 1971-2000 | 109.172      | 14.094        | 0.000 $\pm$ 18.257              |
|                               | RCP2.6 | 2021-2050 | 109.343      | 11.378        | 0.157 $\pm$ 16.592              |
|                               | RCP2.6 | 2071-2100 | 111.656      | 13.116        | 2.276 $\pm$ 17.635              |
|                               | RCP4.5 | 2021-2050 | 112.921      | 11.679        | 3.434 $\pm$ 16.766              |
|                               | RCP4.5 | 2071-2100 | 111.521      | 11.460        | 2.152 $\pm$ 16.639              |
|                               | RCP8.5 | 2021-2050 | 110.654      | 13.203        | 1.357 $\pm$ 17.690              |
|                               | RCP8.5 | 2071-2100 | 109.251      | 11.946        | 0.072 $\pm$ 16.923              |
| CENTRAL MACEDONIA &<br>ATHOS  | Hist   | 1971-2000 | 96.046       | 9.551         | 0.000 $\pm$ 14.064              |
|                               | RCP2.6 | 2021-2050 | 98.242       | 14.125        | 2.286 $\pm$ 17.753              |
|                               | RCP2.6 | 2071-2100 | 97.566       | 9.540         | 1.582 $\pm$ 14.055              |
|                               | RCP4.5 | 2021-2050 | 95.665       | 9.359         | -0.396 $\pm$ 13.923             |
|                               | RCP4.5 | 2071-2100 | 99.085       | 12.838        | 3.164 $\pm$ 16.660              |
|                               | RCP8.5 | 2021-2050 | 96.707       | 11.286        | 0.688 $\pm$ 15.394              |
|                               | RCP8.5 | 2071-2100 | 101.837      | 16.536        | 6.029 $\pm$ 19.882              |
| WESTERN MACEDONIA             | Hist   | 1971-2000 | 81.687       | 15.347        | 0.000 $\pm$ 26.570              |
|                               | RCP2.6 | 2021-2050 | 82.880       | 17.018        | 1.460 $\pm$ 28.054              |
|                               | RCP2.6 | 2071-2100 | 85.044       | 13.866        | 4.109 $\pm$ 25.320              |
|                               | RCP4.5 | 2021-2050 | 80.333       | 12.875        | -1.657 $\pm$ 24.523             |
|                               | RCP4.5 | 2071-2100 | 86.034       | 14.022        | 5.322 $\pm$ 25.449              |
|                               | RCP8.5 | 2021-2050 | 83.490       | 14.296        | 2.207 $\pm$ 25.676              |
|                               | RCP8.5 | 2071-2100 | 87.034       | 15.581        | 6.546 $\pm$ 26.773              |
| EPIRUS                        | Hist   | 1971-2000 | 164.676      | 26.967        | 0.000 $\pm$ 23.159              |
|                               | RCP2.6 | 2021-2050 | 166.262      | 23.870        | 0.963 $\pm$ 21.870              |
|                               | RCP2.6 | 2071-2100 | 167.545      | 26.983        | 1.742 $\pm$ 23.166              |
|                               | RCP4.5 | 2021-2050 | 164.185      | 21.985        | -0.299 $\pm$ 21.128             |
|                               | RCP4.5 | 2071-2100 | 163.093      | 21.622        | -0.962 $\pm$ 20.990             |
|                               | RCP8.5 | 2021-2050 | 167.132      | 23.953        | 1.491 $\pm$ 21.903              |
|                               | RCP8.5 | 2071-2100 | 162.191      | 26.823        | -1.509 $\pm$ 23.097             |

|                |        |           |         |        |                 |
|----------------|--------|-----------|---------|--------|-----------------|
| THESSALY       | Hist   | 1971-2000 | 113.438 | 15.104 | 0.000 ± 18.830  |
|                | RCP2.6 | 2021-2050 | 114.903 | 20.948 | 1.291 ± 22.766  |
|                | RCP2.6 | 2071-2100 | 119.128 | 17.418 | 5.016 ± 20.324  |
|                | RCP4.5 | 2021-2050 | 109.852 | 16.631 | -3.162 ± 19.805 |
|                | RCP4.5 | 2071-2100 | 115.609 | 17.101 | 1.914 ± 20.113  |
|                | RCP8.5 | 2021-2050 | 112.865 | 14.235 | -0.505 ± 18.296 |
|                | RCP8.5 | 2071-2100 | 120.607 | 21.246 | 6.320 ± 22.980  |
| IONIAN ISLANDS | Hist   | 1971-2000 | 126.068 | 15.343 | 0.000 ± 17.212  |
|                | RCP2.6 | 2021-2050 | 127.125 | 16.243 | 0.839 ± 17.724  |
|                | RCP2.6 | 2071-2100 | 130.514 | 15.003 | 3.527 ± 17.022  |
|                | RCP4.5 | 2021-2050 | 124.162 | 15.416 | -1.512 ± 17.253 |
|                | RCP4.5 | 2071-2100 | 127.147 | 15.638 | 0.856 ± 17.378  |
|                | RCP8.5 | 2021-2050 | 125.098 | 16.716 | -0.769 ± 17.998 |
|                | RCP8.5 | 2071-2100 | 128.438 | 18.167 | 1.881 ± 18.862  |
| WESTERN GREECE | Hist   | 1971-2000 | 138.588 | 22.926 | 0.000 ± 23.395  |
|                | RCP2.6 | 2021-2050 | 136.801 | 21.295 | -1.290 ± 22.578 |
|                | RCP2.6 | 2071-2100 | 140.909 | 24.088 | 1.675 ± 23.995  |
|                | RCP4.5 | 2021-2050 | 139.243 | 17.502 | 0.472 ± 20.812  |
|                | RCP4.5 | 2071-2100 | 138.190 | 18.431 | -0.287 ± 21.225 |
|                | RCP8.5 | 2021-2050 | 137.621 | 18.506 | -0.698 ± 21.259 |
|                | RCP8.5 | 2071-2100 | 134.564 | 19.224 | -2.904 ± 21.588 |
| CENTRAL GREECE | Hist   | 1971-2000 | 113.071 | 13.953 | 0.000 ± 17.451  |
|                | RCP2.6 | 2021-2050 | 114.264 | 17.650 | 1.055 ± 19.898  |
|                | RCP2.6 | 2071-2100 | 116.111 | 13.964 | 2.689 ± 17.458  |
|                | RCP4.5 | 2021-2050 | 111.746 | 13.959 | -1.172 ± 17.455 |
|                | RCP4.5 | 2071-2100 | 113.203 | 18.482 | 0.117 ± 20.480  |
|                | RCP8.5 | 2021-2050 | 114.496 | 12.835 | 1.260 ± 16.766  |
|                | RCP8.5 | 2071-2100 | 117.677 | 17.561 | 4.073 ± 19.836  |
| ATTICA         | Hist   | 1971-2000 | 79.244  | 8.740  | 0.000 ± 15.598  |
|                | RCP2.6 | 2021-2050 | 79.356  | 10.148 | 0.141 ± 16.901  |
|                | RCP2.6 | 2071-2100 | 80.012  | 8.193  | 0.970 ± 15.117  |
|                | RCP4.5 | 2021-2050 | 78.282  | 9.679  | -1.214 ± 16.457 |
|                | RCP4.5 | 2071-2100 | 79.021  | 12.889 | -0.281 ± 19.652 |

|              |        |           |         |        |                  |
|--------------|--------|-----------|---------|--------|------------------|
|              | RCP8.5 | 2021-2050 | 82.013  | 9.263  | 3.495 ± 16.071   |
|              | RCP8.5 | 2071-2100 | 79.979  | 10.354 | 0.927 ± 17.098   |
| PELOPONNESE  | Hist   | 1971-2000 | 110.337 | 16.057 | 0.000 ± 20.581   |
|              | RCP2.6 | 2021-2050 | 106.727 | 14.661 | -3.272 ± 19.706  |
|              | RCP2.6 | 2071-2100 | 110.279 | 13.796 | -0.052 ± 19.186  |
|              | RCP4.5 | 2021-2050 | 107.376 | 13.712 | -2.684 ± 19.137  |
|              | RCP4.5 | 2071-2100 | 104.456 | 13.944 | -5.330 ± 19.274  |
|              | RCP8.5 | 2021-2050 | 109.302 | 11.926 | -0.939 ± 18.128  |
|              | RCP8.5 | 2071-2100 | 101.224 | 13.502 | -8.260 ± 19.014  |
| NORTH AEGEAN | Hist   | 1971-2000 | 92.457  | 12.395 | 0.000 ± 18.959   |
|              | RCP2.6 | 2021-2050 | 95.490  | 15.280 | 3.280 ± 21.280   |
|              | RCP2.6 | 2071-2100 | 96.924  | 14.939 | 4.831 ± 20.995   |
|              | RCP4.5 | 2021-2050 | 94.886  | 14.629 | 2.628 ± 20.738   |
|              | RCP4.5 | 2071-2100 | 95.956  | 12.438 | 3.784 ± 18.992   |
|              | RCP8.5 | 2021-2050 | 97.294  | 13.421 | 5.232 ± 19.759   |
|              | RCP8.5 | 2071-2100 | 95.391  | 13.867 | 3.173 ± 20.116   |
| SOUTH AEGEAN | Hist   | 1971-2000 | 76.754  | 7.217  | 0.000 ± 13.298   |
|              | RCP2.6 | 2021-2050 | 79.126  | 9.236  | 3.090 ± 15.271   |
|              | RCP2.6 | 2071-2100 | 80.186  | 8.510  | 4.471 ± 14.538   |
|              | RCP4.5 | 2021-2050 | 77.689  | 7.861  | 1.217 ± 13.904   |
|              | RCP4.5 | 2071-2100 | 79.149  | 7.736  | 3.120 ± 13.784   |
|              | RCP8.5 | 2021-2050 | 80.342  | 9.650  | 4.674 ± 15.699   |
|              | RCP8.5 | 2071-2100 | 75.322  | 8.278  | -1.867 ± 14.309  |
| CRETE        | Hist   | 1971-2000 | 115.866 | 20.665 | 0.000 ± 25.224   |
|              | RCP2.6 | 2021-2050 | 111.909 | 18.016 | -3.415 ± 23.662  |
|              | RCP2.6 | 2071-2100 | 114.559 | 20.785 | -1.128 ± 25.297  |
|              | RCP4.5 | 2021-2050 | 110.589 | 17.204 | -4.554 ± 23.207  |
|              | RCP4.5 | 2071-2100 | 111.547 | 19.309 | -3.727 ± 24.410  |
|              | RCP8.5 | 2021-2050 | 113.187 | 17.810 | -2.312 ± 23.546  |
|              | RCP8.5 | 2071-2100 | 100.869 | 15.621 | -12.943 ± 22.358 |

Table S5 - RxTratio (pages 15-17)

| Subreg.                       | Mode   | Period    | Mean  | StDev | Mean diff. $\pm 1\sigma$            |
|-------------------------------|--------|-----------|-------|-------|-------------------------------------|
| EASTERN MACEDONIA &<br>THRACE | Hist   | 1971-2000 | 0.078 | 0.012 | 0.000 $\pm$ 0.017                   |
|                               | RCP2.6 | 2021-2050 | 0.083 | 0.015 | 0.005 $\pm$ 0.019                   |
|                               | RCP2.6 | 2071-2100 | 0.081 | 0.014 | 0.003 $\pm$ 0.018                   |
|                               | RCP4.5 | 2021-2050 | 0.080 | 0.014 | 0.002 $\pm$ 0.018                   |
|                               | RCP4.5 | 2071-2100 | 0.087 | 0.015 | 0.009 $\pm$ 0.019                   |
|                               | RCP8.5 | 2021-2050 | 0.082 | 0.013 | 0.004 $\pm$ 0.018                   |
|                               | RCP8.5 | 2071-2100 | 0.097 | 0.017 | <b>0.019 <math>\pm</math> 0.021</b> |
| CENTRAL MACEDONIA &<br>ATHOS  | Hist   | 1971-2000 | 0.085 | 0.012 | 0.000 $\pm$ 0.016                   |
|                               | RCP2.6 | 2021-2050 | 0.090 | 0.012 | 0.005 $\pm$ 0.017                   |
|                               | RCP2.6 | 2071-2100 | 0.088 | 0.013 | 0.002 $\pm$ 0.017                   |
|                               | RCP4.5 | 2021-2050 | 0.088 | 0.013 | 0.003 $\pm$ 0.018                   |
|                               | RCP4.5 | 2071-2100 | 0.093 | 0.014 | 0.008 $\pm$ 0.018                   |
|                               | RCP8.5 | 2021-2050 | 0.089 | 0.014 | 0.004 $\pm$ 0.018                   |
|                               | RCP8.5 | 2071-2100 | 0.106 | 0.016 | <b>0.020 <math>\pm</math> 0.020</b> |
| WESTERN MACEDONIA             | Hist   | 1971-2000 | 0.066 | 0.008 | 0.000 $\pm$ 0.011                   |
|                               | RCP2.6 | 2021-2050 | 0.070 | 0.008 | 0.004 $\pm$ 0.011                   |
|                               | RCP2.6 | 2071-2100 | 0.070 | 0.008 | 0.004 $\pm$ 0.011                   |
|                               | RCP4.5 | 2021-2050 | 0.070 | 0.010 | 0.004 $\pm$ 0.013                   |
|                               | RCP4.5 | 2071-2100 | 0.074 | 0.011 | <b>0.009 <math>\pm</math> 0.014</b> |
|                               | RCP8.5 | 2021-2050 | 0.069 | 0.009 | 0.003 $\pm$ 0.012                   |
|                               | RCP8.5 | 2071-2100 | 0.083 | 0.012 | <b>0.018 <math>\pm</math> 0.014</b> |
| EPIRUS                        | Hist   | 1971-2000 | 0.055 | 0.010 | 0.000 $\pm$ 0.014                   |
|                               | RCP2.6 | 2021-2050 | 0.059 | 0.011 | 0.004 $\pm$ 0.015                   |
|                               | RCP2.6 | 2071-2100 | 0.058 | 0.011 | 0.003 $\pm$ 0.015                   |
|                               | RCP4.5 | 2021-2050 | 0.058 | 0.012 | 0.003 $\pm$ 0.015                   |
|                               | RCP4.5 | 2071-2100 | 0.061 | 0.011 | 0.007 $\pm$ 0.014                   |
|                               | RCP8.5 | 2021-2050 | 0.059 | 0.012 | 0.004 $\pm$ 0.016                   |
|                               | RCP8.5 | 2071-2100 | 0.069 | 0.014 | <b>0.014 <math>\pm</math> 0.017</b> |

|                |        |           |       |       |                      |
|----------------|--------|-----------|-------|-------|----------------------|
| THESSALY       | Hist   | 1971-2000 | 0.085 | 0.012 | 0.000 ± 0.016        |
|                | RCP2.6 | 2021-2050 | 0.090 | 0.013 | 0.005 ± 0.018        |
|                | RCP2.6 | 2071-2100 | 0.089 | 0.014 | 0.004 ± 0.018        |
|                | RCP4.5 | 2021-2050 | 0.089 | 0.014 | 0.004 ± 0.018        |
|                | RCP4.5 | 2071-2100 | 0.095 | 0.015 | 0.010 ± 0.019        |
|                | RCP8.5 | 2021-2050 | 0.090 | 0.015 | 0.005 ± 0.019        |
|                | RCP8.5 | 2071-2100 | 0.109 | 0.021 | <b>0.024 ± 0.024</b> |
| IONIAN ISLANDS | Hist   | 1971-2000 | 0.060 | 0.011 | 0.000 ± 0.015        |
|                | RCP2.6 | 2021-2050 | 0.063 | 0.010 | 0.003 ± 0.015        |
|                | RCP2.6 | 2071-2100 | 0.063 | 0.011 | 0.002 ± 0.015        |
|                | RCP4.5 | 2021-2050 | 0.062 | 0.012 | 0.001 ± 0.016        |
|                | RCP4.5 | 2071-2100 | 0.068 | 0.012 | 0.007 ± 0.016        |
|                | RCP8.5 | 2021-2050 | 0.064 | 0.012 | 0.003 ± 0.016        |
|                | RCP8.5 | 2071-2100 | 0.080 | 0.018 | <b>0.020 ± 0.021</b> |
| WESTERN GREECE | Hist   | 1971-2000 | 0.059 | 0.010 | 0.000 ± 0.014        |
|                | RCP2.6 | 2021-2050 | 0.061 | 0.011 | 0.003 ± 0.015        |
|                | RCP2.6 | 2071-2100 | 0.061 | 0.011 | 0.002 ± 0.015        |
|                | RCP4.5 | 2021-2050 | 0.061 | 0.012 | 0.002 ± 0.015        |
|                | RCP4.5 | 2071-2100 | 0.065 | 0.012 | 0.007 ± 0.016        |
|                | RCP8.5 | 2021-2050 | 0.062 | 0.011 | 0.003 ± 0.015        |
|                | RCP8.5 | 2071-2100 | 0.077 | 0.015 | <b>0.019 ± 0.018</b> |
| CENTRAL GREECE | Hist   | 1971-2000 | 0.082 | 0.013 | 0.000 ± 0.018        |
|                | RCP2.6 | 2021-2050 | 0.085 | 0.015 | 0.004 ± 0.020        |
|                | RCP2.6 | 2071-2100 | 0.085 | 0.014 | 0.003 ± 0.019        |
|                | RCP4.5 | 2021-2050 | 0.086 | 0.015 | 0.004 ± 0.020        |
|                | RCP4.5 | 2071-2100 | 0.089 | 0.015 | 0.008 ± 0.019        |
|                | RCP8.5 | 2021-2050 | 0.087 | 0.016 | 0.006 ± 0.020        |
|                | RCP8.5 | 2071-2100 | 0.106 | 0.023 | <b>0.025 ± 0.026</b> |
| ATTICA         | Hist   | 1971-2000 | 0.095 | 0.012 | 0.000 ± 0.017        |
|                | RCP2.6 | 2021-2050 | 0.101 | 0.017 | 0.006 ± 0.021        |
|                | RCP2.6 | 2071-2100 | 0.099 | 0.015 | 0.005 ± 0.019        |
|                | RCP4.5 | 2021-2050 | 0.101 | 0.016 | 0.006 ± 0.020        |
|                | RCP4.5 | 2071-2100 | 0.107 | 0.016 | <b>0.013 ± 0.020</b> |



|              |        |           |       |       |                      |
|--------------|--------|-----------|-------|-------|----------------------|
|              | RCP8.5 | 2021-2050 | 0.103 | 0.017 | 0.009 ± 0.021        |
|              | RCP8.5 | 2071-2100 | 0.126 | 0.023 | <b>0.031 ± 0.026</b> |
| PELOPONNESE  | Hist   | 1971-2000 | 0.079 | 0.014 | 0.000 ± 0.020        |
|              | RCP2.6 | 2021-2050 | 0.083 | 0.016 | 0.004 ± 0.021        |
|              | RCP2.6 | 2071-2100 | 0.084 | 0.015 | 0.005 ± 0.020        |
|              | RCP4.5 | 2021-2050 | 0.082 | 0.016 | 0.003 ± 0.021        |
|              | RCP4.5 | 2071-2100 | 0.088 | 0.017 | 0.009 ± 0.022        |
|              | RCP8.5 | 2021-2050 | 0.087 | 0.017 | 0.008 ± 0.022        |
|              | RCP8.5 | 2071-2100 | 0.102 | 0.022 | <b>0.023 ± 0.026</b> |
| NORTH AEGEAN | Hist   | 1971-2000 | 0.080 | 0.013 | 0.000 ± 0.019        |
|              | RCP2.6 | 2021-2050 | 0.085 | 0.014 | 0.005 ± 0.019        |
|              | RCP2.6 | 2071-2100 | 0.082 | 0.013 | 0.003 ± 0.019        |
|              | RCP4.5 | 2021-2050 | 0.082 | 0.015 | 0.002 ± 0.020        |
|              | RCP4.5 | 2071-2100 | 0.089 | 0.014 | 0.009 ± 0.019        |
|              | RCP8.5 | 2021-2050 | 0.085 | 0.014 | 0.005 ± 0.020        |
|              | RCP8.5 | 2071-2100 | 0.103 | 0.018 | <b>0.023 ± 0.022</b> |
| SOUTH AEGEAN | Hist   | 1971-2000 | 0.080 | 0.011 | 0.000 ± 0.015        |
|              | RCP2.6 | 2021-2050 | 0.088 | 0.012 | 0.008 ± 0.016        |
|              | RCP2.6 | 2071-2100 | 0.084 | 0.011 | 0.004 ± 0.016        |
|              | RCP4.5 | 2021-2050 | 0.087 | 0.012 | 0.007 ± 0.016        |
|              | RCP4.5 | 2071-2100 | 0.093 | 0.013 | <b>0.013 ± 0.017</b> |
|              | RCP8.5 | 2021-2050 | 0.088 | 0.013 | 0.008 ± 0.017        |
|              | RCP8.5 | 2071-2100 | 0.109 | 0.020 | <b>0.029 ± 0.023</b> |
| CRETE        | Hist   | 1971-2000 | 0.079 | 0.019 | 0.000 ± 0.026        |
|              | RCP2.6 | 2021-2050 | 0.087 | 0.021 | 0.008 ± 0.028        |
|              | RCP2.6 | 2071-2100 | 0.085 | 0.018 | 0.006 ± 0.026        |
|              | RCP4.5 | 2021-2050 | 0.085 | 0.022 | 0.006 ± 0.029        |
|              | RCP4.5 | 2071-2100 | 0.091 | 0.022 | 0.012 ± 0.029        |
|              | RCP8.5 | 2021-2050 | 0.088 | 0.019 | 0.009 ± 0.027        |
|              | RCP8.5 | 2071-2100 | 0.106 | 0.030 | <b>0.027 ± 0.036</b> |

Figure S1- MB (page 18)

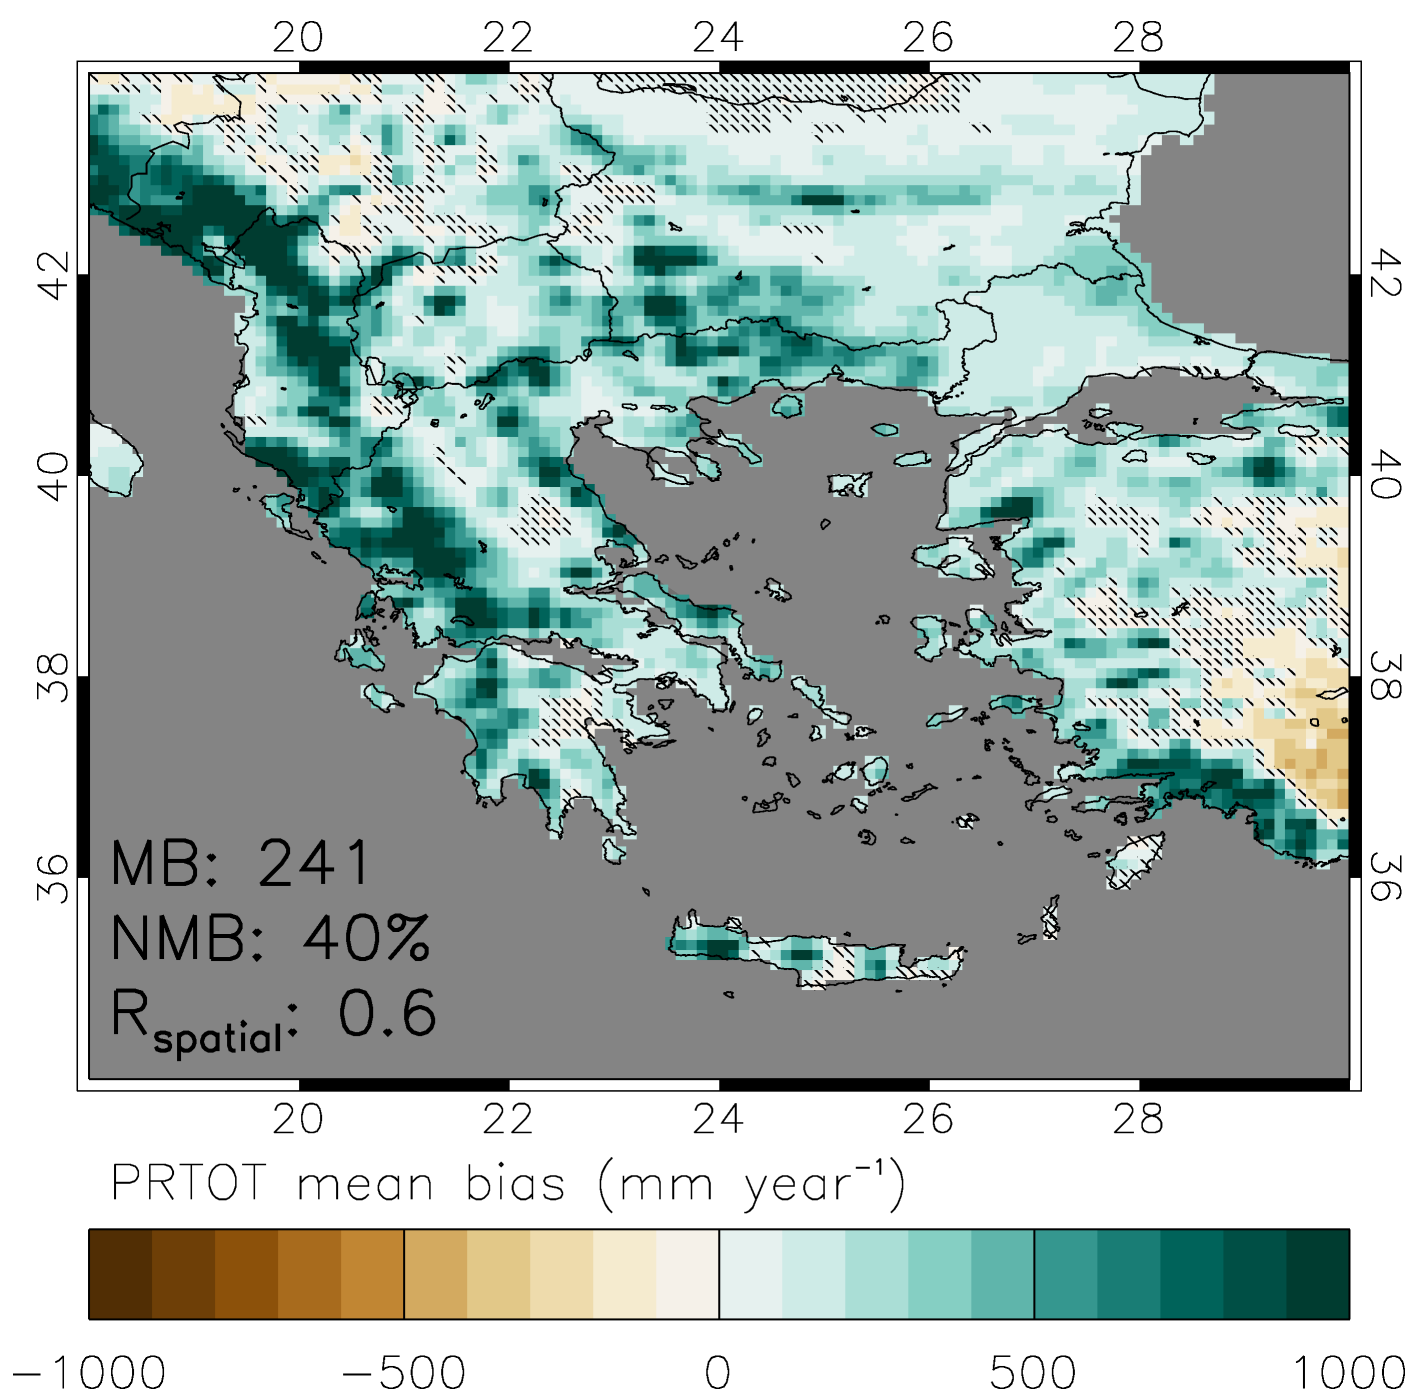

Figure S2- Rx1day (pages 19-23)

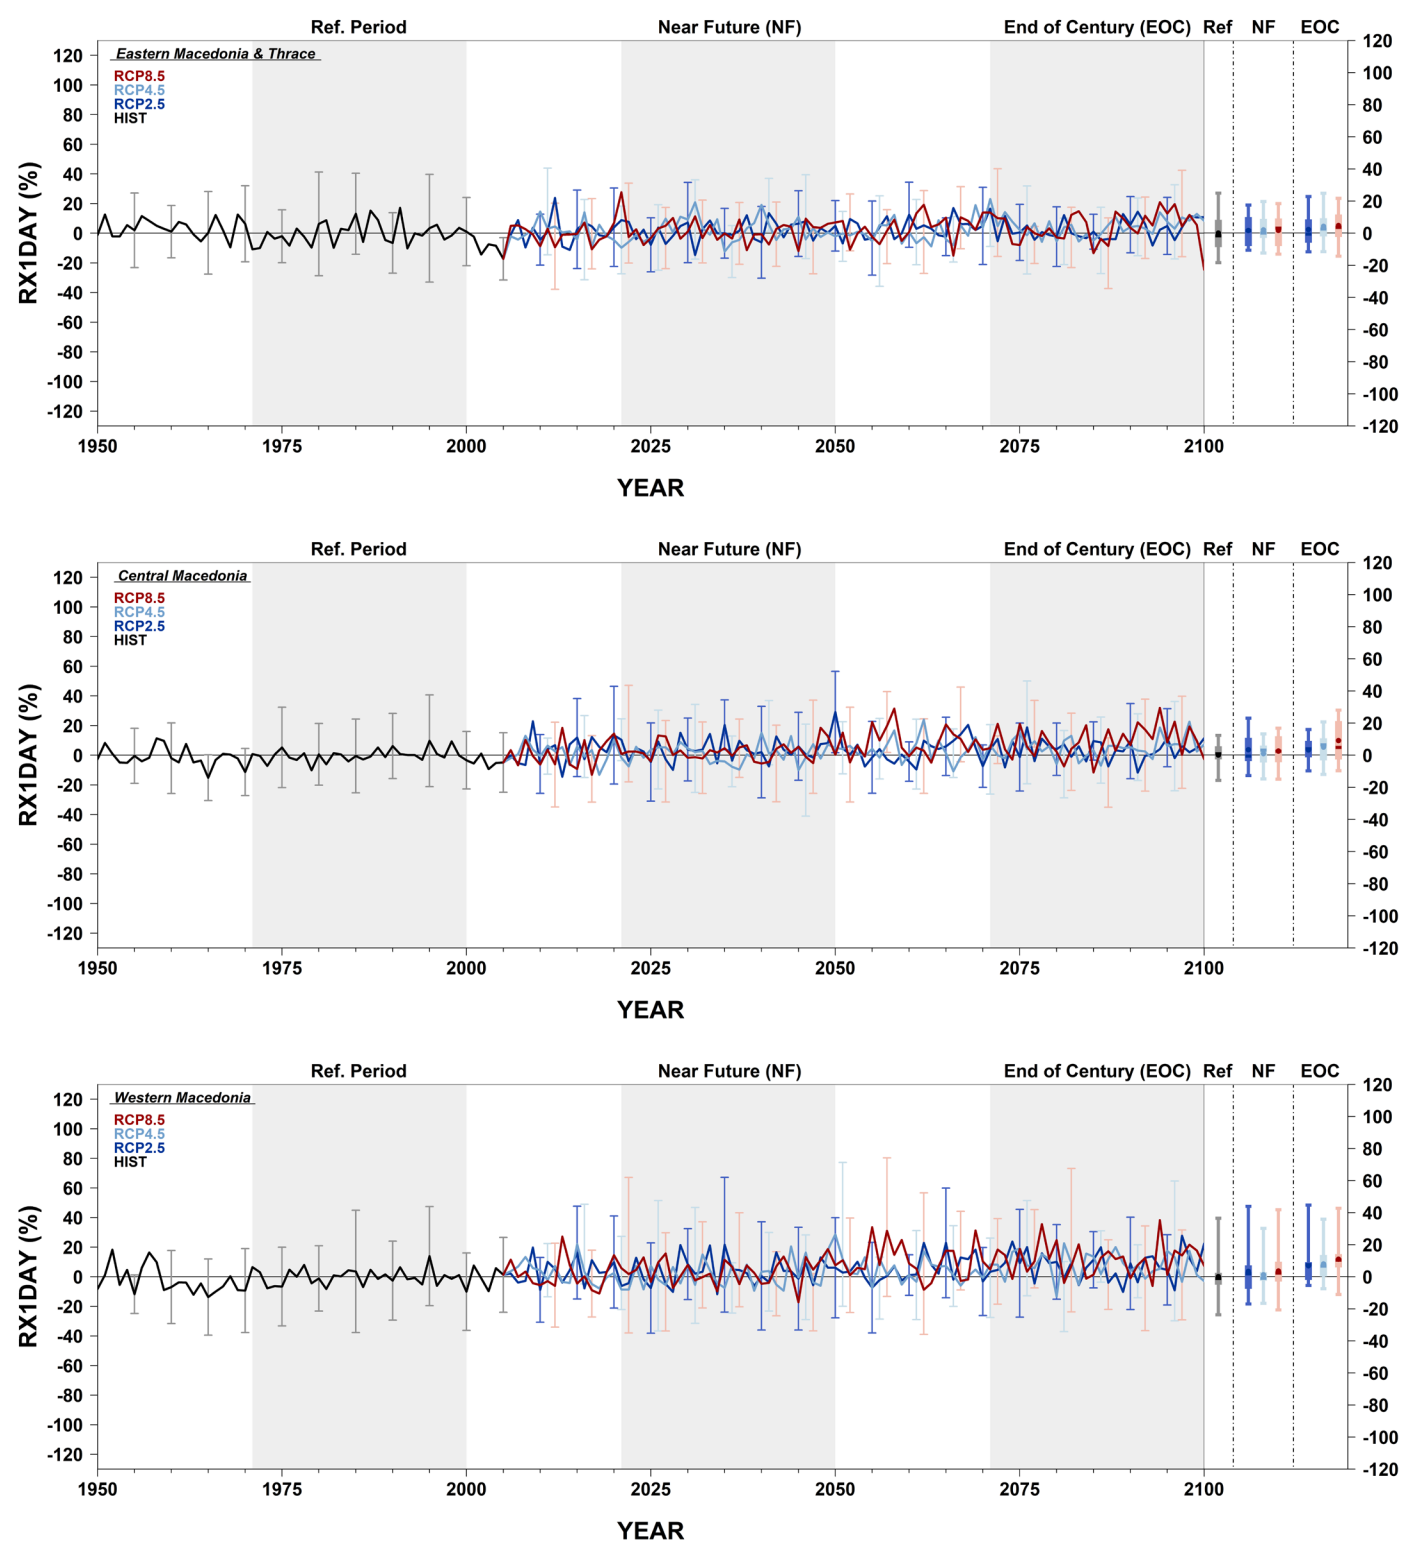

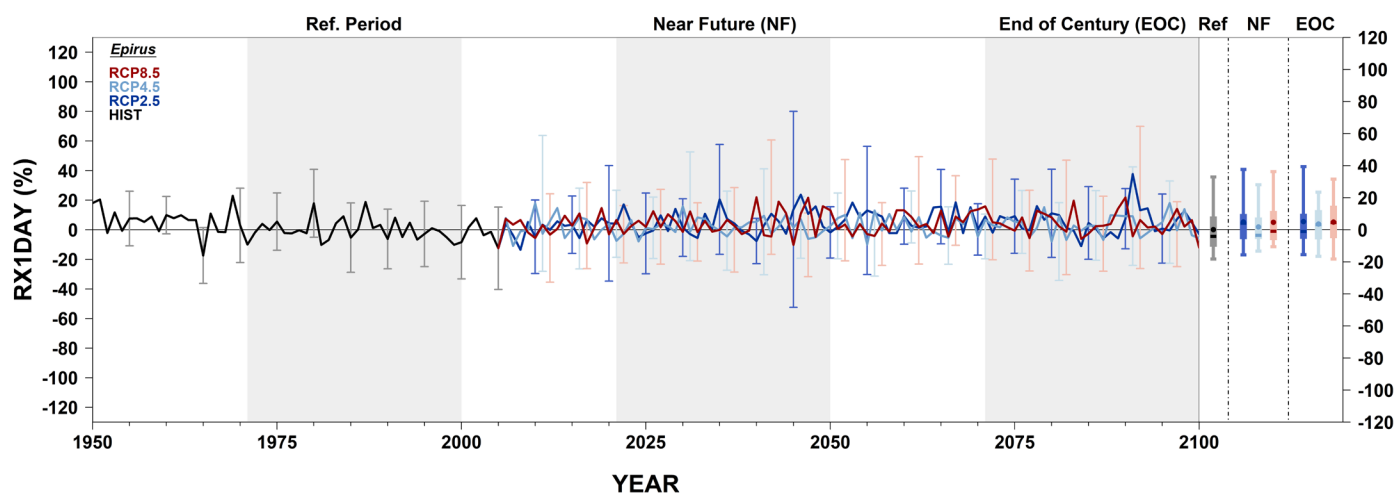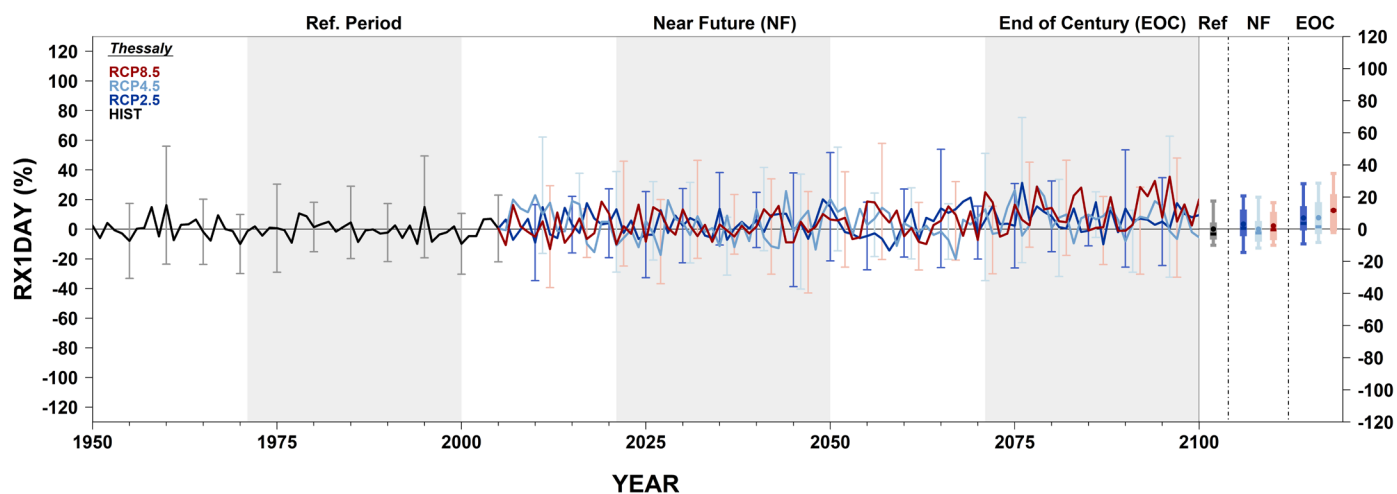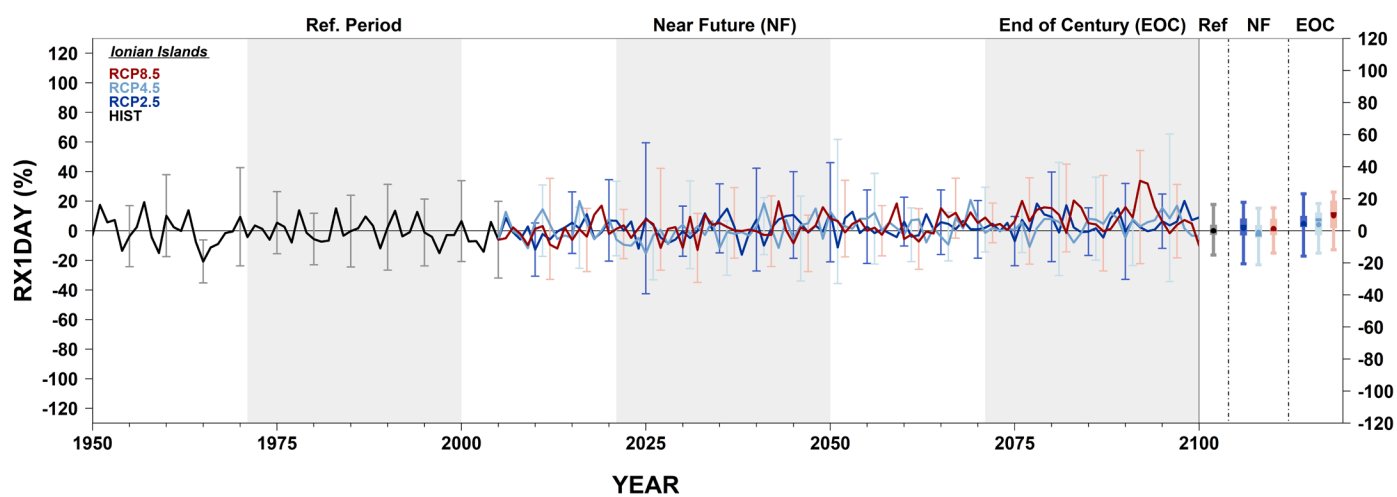

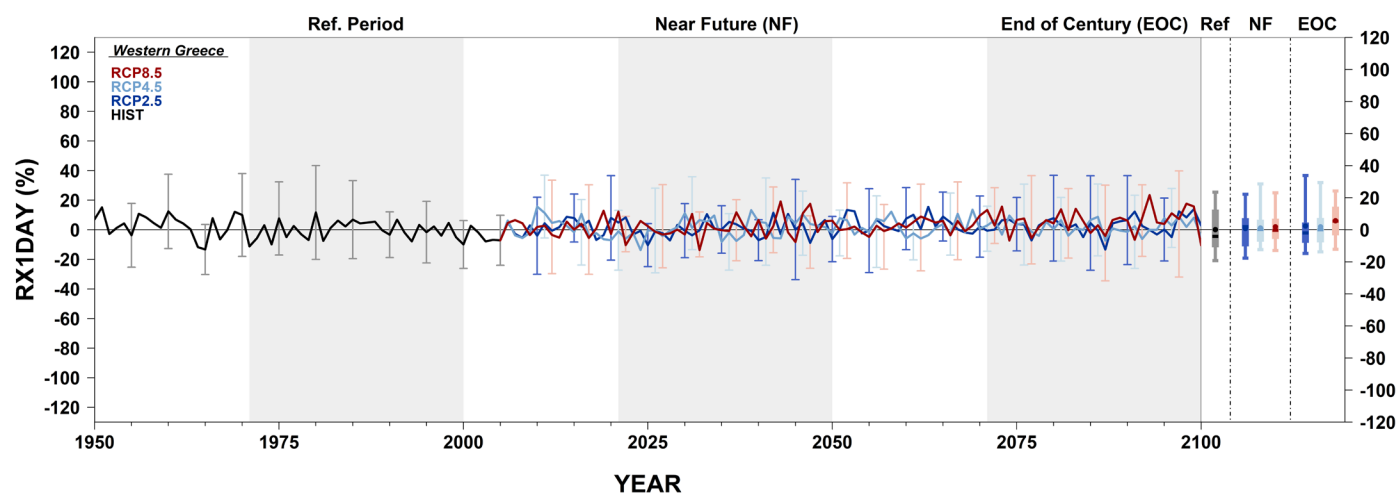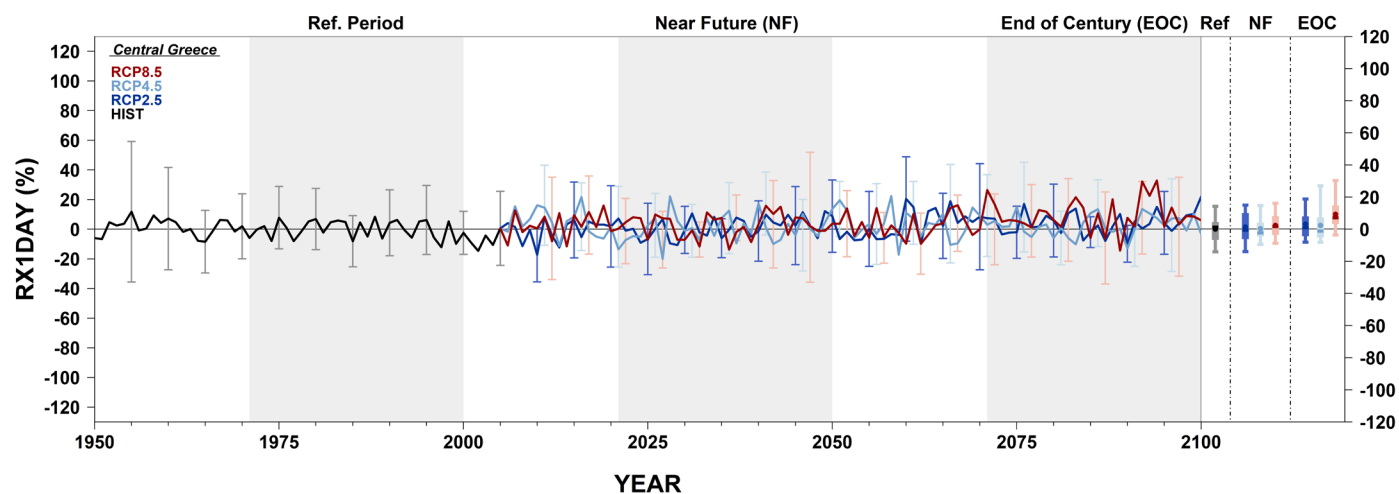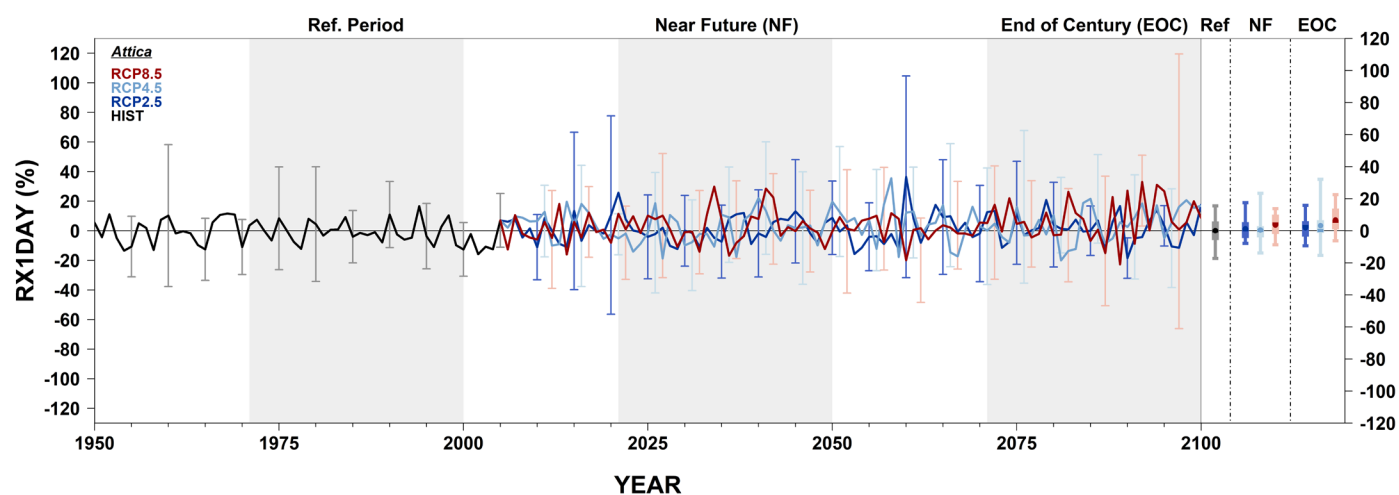

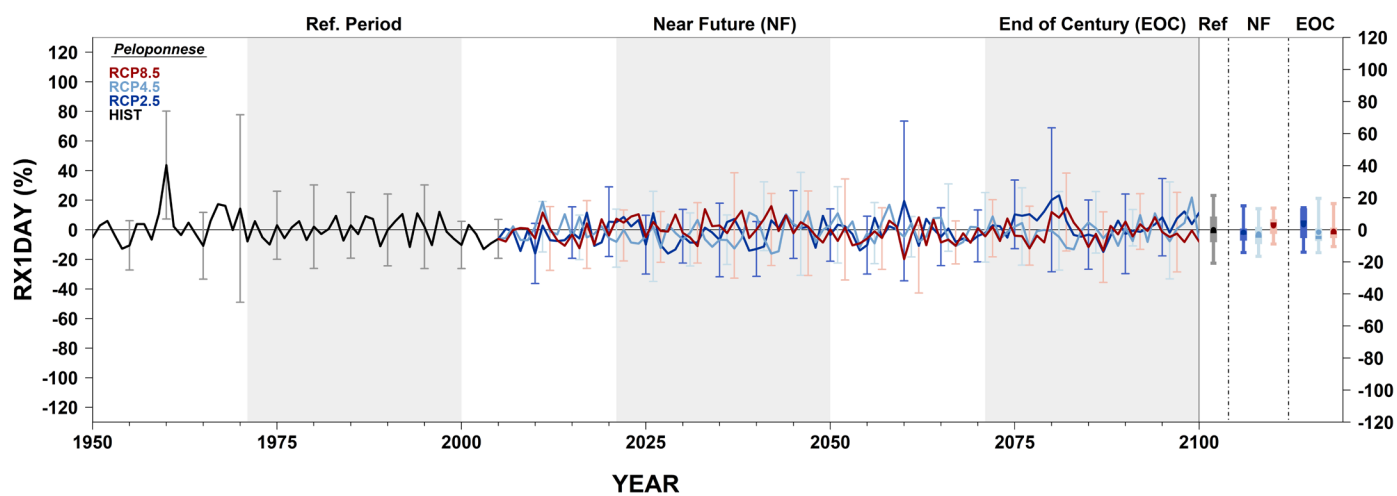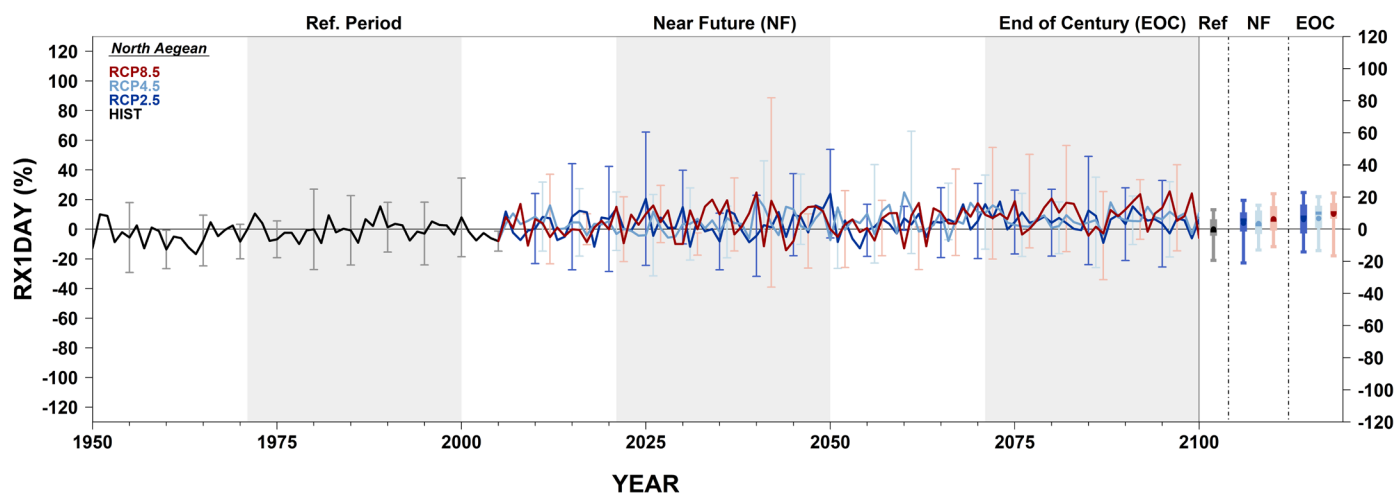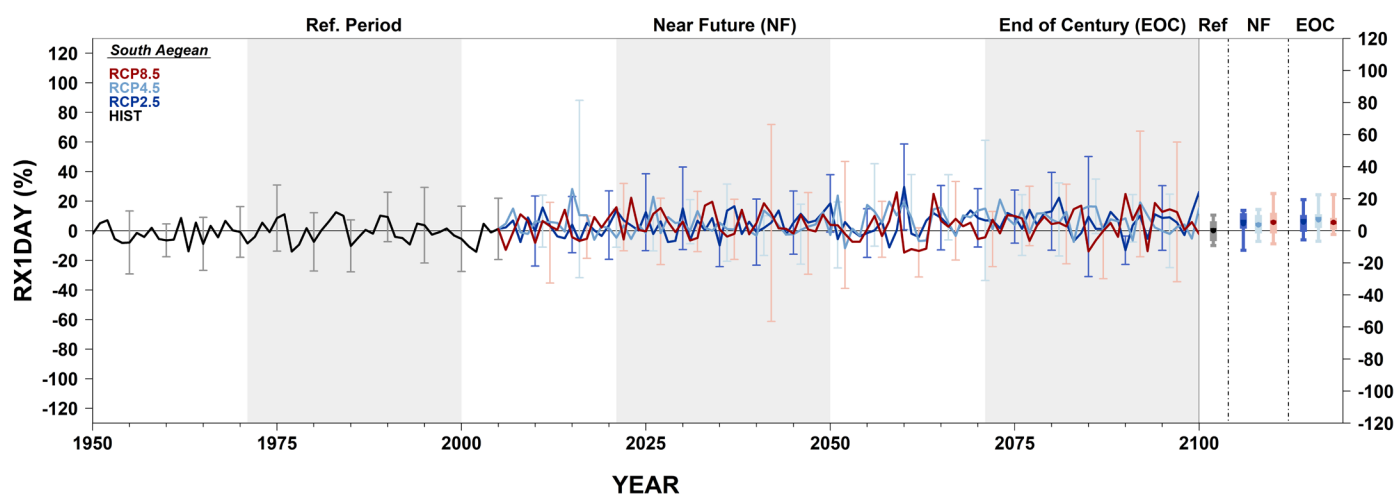

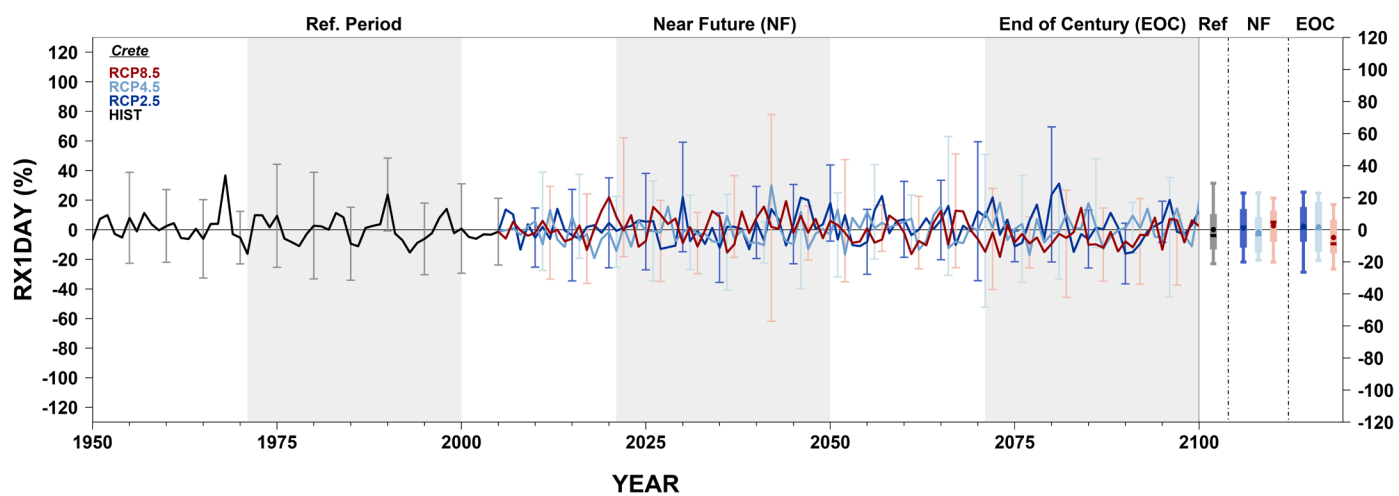

Supplement: s1 [file s1]
